# Supplementary material for: Problem-based learning and case-based learning in dental education
Source: PubMed Central journal article supplement — Ann Transl Med. 2021 Jul;9(14):1137. doi: 10.21037/atm-21-165 (PMC8350629; doi:10.21037/atm-21-165), 2021-07
Supplement: atm-09-14-1137-dss.pdf [file atm-09-14-1137-dss.pdf]

## Data Sharing Statement

|                     |                                                                                                                                                     |                                                                                   |
|---------------------|-----------------------------------------------------------------------------------------------------------------------------------------------------|-----------------------------------------------------------------------------------|
| <b>Article Info</b> | <a href="http://dx.doi.org/10.21037/atm-21-165">http://dx.doi.org/10.21037/atm-21-165</a>                                                           |                                                                                   |
| <b>Item</b>         | <b>Question</b>                                                                                                                                     | <b>Authors' Response<br/>(place "-" if not applicable)</b>                        |
| 1                   | Would you like to share data collected for your study to others?                                                                                    | Yes.                                                                              |
| 2                   | If not, would you like to share the reason for your decision?                                                                                       | -                                                                                 |
| 3                   | What data in particular will be shared?                                                                                                             | The data in the questionnaires.                                                   |
| 4                   | Any other documents will be shared? Such as study protocol, statistical analysis plan, informed consent form, clinical study report, analytic code. | Yes, we would like to share the protocol and statistical analysis plan to others. |
| 5                   | When will data availability begin?                                                                                                                  | One year after published.                                                         |
| 6                   | When will data availability end?                                                                                                                    | Ten years.                                                                        |
| 7                   | To whom will you share the data?                                                                                                                    | To all.                                                                           |
| 8                   | For what type of analysis or purpose?                                                                                                               | Teaching research.                                                                |
| 9                   | How or where can the data/documents be obtained?                                                                                                    | E-Mail<br>Yaoyang_x@163.com                                                       |
| 10                  | Any other restrictions?                                                                                                                             | -                                                                                 |
